# Supplementary material for: NLRP3 inflammasome has a protective effect against oxazolone-induced colitis: a possible role in ulcerative colitis
Source: PubMed Central journal article supplement (PMC5155456; doi:10.1038/srep39075), 2016-12-14
Supplement: srep39075-s1.pdf [file srep39075-s1.pdf]

NLRP3 inflammasome has a protective effect against oxazolone-induced colitis: a possible role  
in ulcerative colitis

Shigehiro Itani,<sup>1</sup> MD, Toshio Watanabe,<sup>1,2</sup> MD, PhD, Yuji Nadatani,<sup>1</sup> MD, PhD, Naoki

Sugimura,<sup>1</sup> MD, Sunao Shimada,<sup>1</sup> MD, Shogo Takeda,<sup>1</sup> MD, PhD, Koji Otani,<sup>1</sup> MD, PhD,

Shuhei Hosomi,<sup>1</sup> MD, PhD, Yasuaki Nagami,<sup>1</sup> MD, PhD, Fumio Tanaka,<sup>1</sup> MD, PhD, Noriko

Kamata,<sup>1</sup> MD, PhD, Hirokazu Yamagami,<sup>1</sup> MD, PhD, Tetsuya Tanigawa,<sup>1,2</sup> MD, PhD,

Masatsugu Shiba,<sup>1</sup> MD, PhD, Kazunari Tominaga,<sup>1,2</sup> MD, PhD, Yasuhiro Fujiwara,<sup>1,2</sup> MD, PhD,

Tetsuo Arakawa,<sup>1</sup> MD, PhD

<sup>1</sup>Department of Gastroenterology, Osaka City University Graduate School of Medicine, Osaka,

Japan

<sup>2</sup>SAMURAI International GI Research Center, Osaka, Japan

**Supplementary Figure 1. Effects of caspase-1 deficiency on oxazolone-induced colitis.** A:

Changes in body weight during the experimental period. Round represents WT, wild-type. B, C:

Comparison of histological score between wild-type and caspase-1<sup>-/-</sup> mice on days 1 and 3.

Histological scores were calculated according to the criteria (Supplementary Table 3). D, E:

Histological findings in wild-type (D) and caspase-1<sup>-/-</sup> mice (E) with colitis. Compared to

wild-type mice, caspase-1<sup>-/-</sup> mice exhibited severe colitis.

**Supplementary Figure 2. The influence of cohousing on OXA-induced colitis in NLRP3<sup>-/-</sup>**

**mice and caspase-1<sup>-/-</sup> mice.** The negative effects of NLRP3 deficiency on body weights (A) and

on the histological score of mice (B) were not attenuated by the cohousing of wild-type (WT)

mice with NLRP3<sup>-/-</sup> mice. Histological findings in wild-type (C) and NLRP3<sup>-/-</sup> mice (D) with

colitis. Compared to wild-type mice, NLRP3<sup>-/-</sup> mice exhibited severe colitis. The negative

effects of caspase-1 deficiency on body weights (E) and on the histological score of mice (F)

were not attenuated by the cohousing of wild-type mice with caspase-1<sup>-/-</sup> mice. Histological

findings in wild-type (G) and caspase-1<sup>-/-</sup> mice (H) with colitis. Compared to wild-type mice,

caspase-1<sup>-/-</sup> mice exhibited severe colitis.

### Supplementary Figure 1.

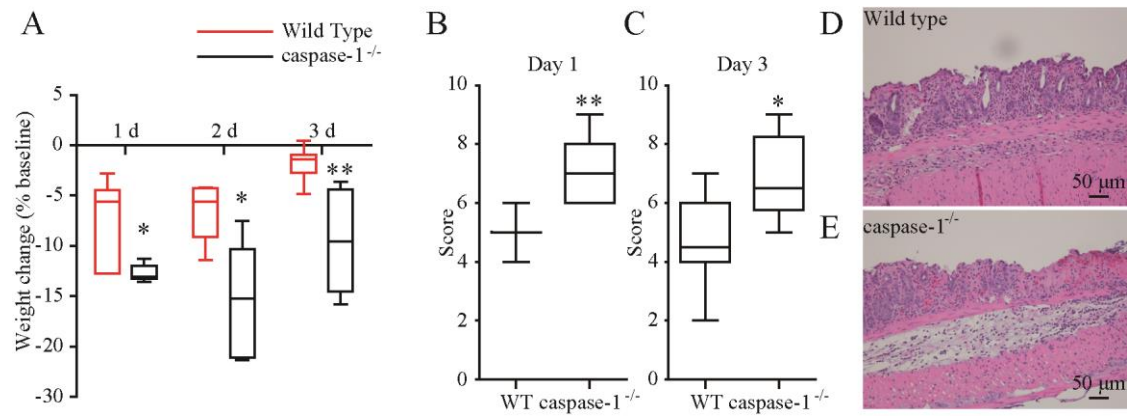

**Supplementary Figure 2.**

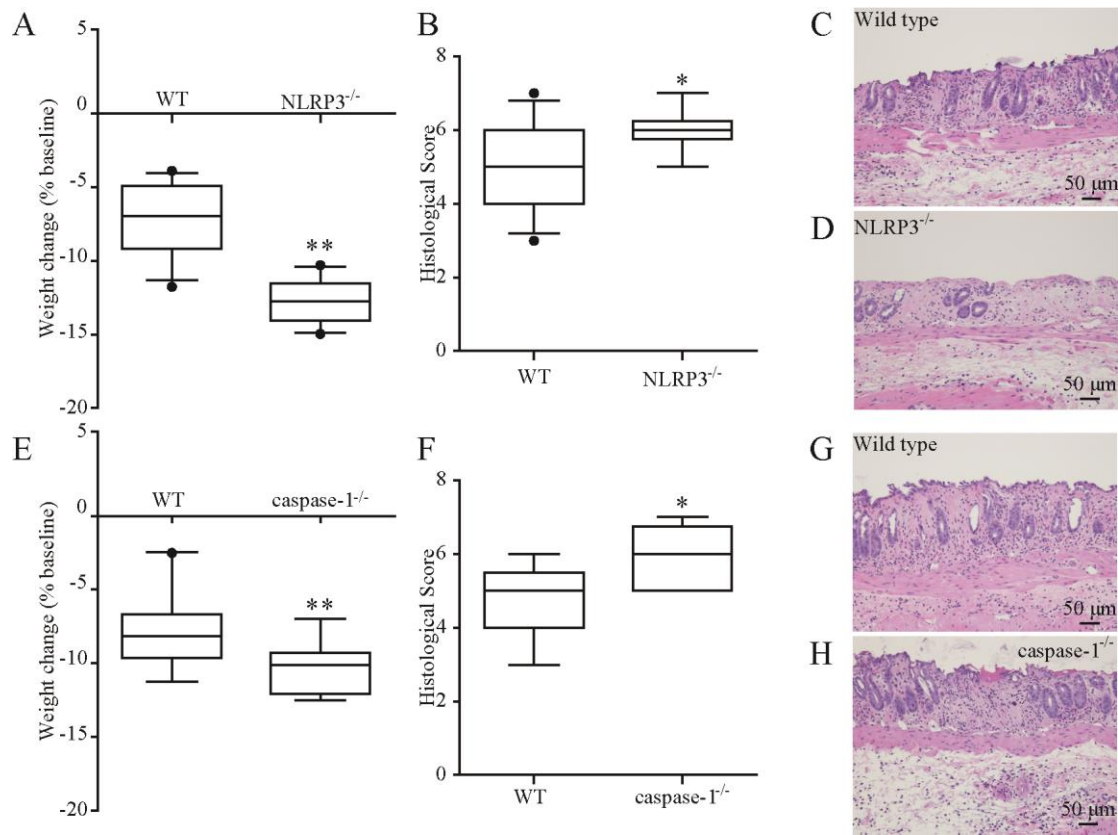

**Supplementary Table 1.** Matts' histopathological grading system

|         |                                                                                                         |
|---------|---------------------------------------------------------------------------------------------------------|
| Grade 1 | normal appearance                                                                                       |
| Grade 2 | some infiltration of the mucosa or lamina propria with either round cells or polymorphs                 |
| Grade 3 | much cellular infiltration of the mucosa, lamina propria, and submucosa                                 |
| Grade 4 | presence of crypt abscesses, with much infiltration of all layers of the mucosa                         |
| Grade 5 | ulceration, erosion, or necrosis of the mucosa, with cellular infiltration of some or all of its layers |

**Supplementary Table 2.** Antibodies Used

|                   | Source information                          | Dosage          | Use         |
|-------------------|---------------------------------------------|-----------------|-------------|
| NLRP3             | mouse monoclonal<br>(AdipoGen)              | 1:200 dilution  | IHC (human) |
| cleaved caspase-1 | rabbit polyclonal<br>(EnoGene)              | 1:200 dilution  | IHC (human) |
| CD68              | rabbit polyclonal<br>(LifeSpan BioSciences) | 1:200 dilution  | IHC (human) |
| CD68              | mouse monoclonal<br>(Abcam)                 | 1:100 dilution  | IHC (human) |
| MUC2              | rabbit polyclonal<br>(GeneTex)              | 1:800 dilution  | IHC (mouse) |
| NLRP3             | mouse monoclonal<br>(AdipoGen)              | 1:1000 dilution | WB (mouse)  |
| caspase-1         | rabbit polyclonal<br>(Santa Cruz)           | 1:200 dilution  | WB (mouse)  |
| IL-1 $\beta$      | goat polyclonal<br>(R&D Systems)            | 1:500 dilution  | WB (mouse)  |
| IL-18             | rabbit polyclonal<br>(Abnova)               | 1:500 dilution  | WB (mouse)  |
| CDX2              | mouse monoclonal<br>(Santa Cruz)            | 1:100 dilution  | WB (mouse)  |
| $\beta$ -actin    | mouse monoclonal<br>(Sigma-Aldrich)         | 1:5000 dilution | WB (mouse)  |

**Supplementary Table 3.** Summary of checked specific pathogens.

|                 |                                          | Charles River Laboratories International, Inc. | Laboratory Animal Center, Graduate School of Medicine, Osaka City University |
|-----------------|------------------------------------------|------------------------------------------------|------------------------------------------------------------------------------|
| <b>Bacteria</b> |                                          |                                                |                                                                              |
|                 | Pneumonia Virus of Mice                  | ○                                              | ○                                                                            |
|                 | Reovirus                                 | ○                                              |                                                                              |
|                 | Mouse Hepatitis Virus                    | ○                                              | ○                                                                            |
|                 | Murine Norovirus                         | ○                                              |                                                                              |
|                 | Theiler's Murine Encephalomyelitis Virus | ○                                              |                                                                              |
|                 | Minute Virus of Mice                     | ○                                              |                                                                              |
|                 | Epizootic Diarrhea of Infant Mice Virus  | ○                                              |                                                                              |
|                 | Mouse Parvovirus (1 and 2)               | ○                                              |                                                                              |
|                 | Lymphocytic Choriomeningitis Virus       | ○                                              | ○                                                                            |
|                 | Hantaan Virus                            | ○                                              |                                                                              |
|                 | Mouse Adenovirus (1 and 2)               | ○                                              | ○                                                                            |
|                 | Polyoma Virus                            | ○                                              |                                                                              |
|                 | Mouse Pneumonitis Virus                  | ○                                              |                                                                              |
|                 | Mouse Cytomegalovirus                    | ○                                              |                                                                              |
|                 | Ectromelia virus                         | ○                                              | ○                                                                            |
|                 | Mouse Thymic Virus                       | ○                                              |                                                                              |
|                 | Sendai Virus                             |                                                | ○                                                                            |
| <b>Virus</b>    |                                          |                                                |                                                                              |
|                 | Coryne bacterium kutscheri               | ○                                              | ○                                                                            |
|                 | Pseudomonas aeruginosa                   | ○                                              |                                                                              |
|                 | Salmonella spp.                          | ○                                              | ○                                                                            |
|                 | Streptococcus pneumoniae                 | ○                                              |                                                                              |
|                 | Pasteurella pneumotropica                | ○                                              | ○                                                                            |
|                 | Citrobacter rodentium                    | ○                                              |                                                                              |
|                 | Helicobacter hepaticus                   | ○                                              |                                                                              |
|                 | Helicobacter bilis                       | ○                                              |                                                                              |

|                         |                                 |                       |                       |
|-------------------------|---------------------------------|-----------------------|-----------------------|
|                         | Helicobacter spp.               | <input type="radio"/> |                       |
|                         | Streptobacillus moniliformis    | <input type="radio"/> |                       |
|                         | Mycoplasma pulmonis             | <input type="radio"/> | <input type="radio"/> |
|                         | Clostridium piliforme           | <input type="radio"/> | <input type="radio"/> |
|                         | CAR Bacillus                    | <input type="radio"/> |                       |
| <b>Parasite, Fungus</b> |                                 |                       |                       |
|                         | Ectoparasites                   | <input type="radio"/> |                       |
|                         | Gastrointestinal protozoa       |                       |                       |
|                         | -Spirochete                     | <input type="radio"/> | <input type="radio"/> |
|                         | -Giardia                        | <input type="radio"/> | <input type="radio"/> |
|                         | -Non-Pathogenic Protozoa        | <input type="radio"/> |                       |
|                         | Pinworms(Aspicularis, Syphacia) | <input type="radio"/> | <input type="radio"/> |
|                         | Encephalitozoon cuniculi        | <input type="radio"/> |                       |



**Supplementary Table 4.** Histological injury score

| <b>Histological appearance</b>              | <b>score</b> |
|---------------------------------------------|--------------|
| <b>I Enterocyte loss</b>                    |              |
| Normal                                      | 0            |
| Loss of single cell                         | 1            |
| Loss of groups of cells                     | 2            |
| Frank ulceration                            | 3            |
| <b>II Crypt inflammation</b>                |              |
| Normal                                      | 0            |
| Single inflammatory cell                    | 1            |
| Cryptitis                                   | 2            |
| Crypt abscess                               | 3            |
| <b>III Lamina propria mononuclear cells</b> |              |
| Normal                                      | 0            |
| Slight increase                             | 1            |
| Moderate increase                           | 2            |
| Marked increase                             | 3            |
| <b>IV Neutrophils</b>                       |              |
| Normal                                      | 0            |
| Slight increase                             | 1            |
| Moderate increase                           | 2            |
| Marked increase                             | 3            |
| <b>V Epithelial hyperplasia</b>             |              |
| Normal                                      | 0            |
| Mild                                        | 1            |
| Moderate                                    | 2            |
| Pseudopolyp                                 | 3            |

**Supplementary Table 5. Primers and Probes**

| Gene          |                  | Primer and Probe                              |
|---------------|------------------|-----------------------------------------------|
| MUC2          | Probe            | 5'-FAM-TCTGCATTGACTGGCGGAACCACACC-TAMRA-3'    |
|               | Primer (forward) | 5'-ACCCTCTGTGCCAAGGAAGG-3'                    |
|               | Primer (reverse) | 5'-TGGGCACTTCACAGAGCAGA-3'                    |
| CDX2          | Probe            | 5'-FAM-TTCCGCATCCACTCGCAGGTTTCG- TAMRA-3'     |
|               | Primer (forward) | 5'-CCGCCGAACAGCTGTCCC-3'                      |
|               | Primer (reverse) | 5'-TCCTGGTTTTCACTTGGCTTCC-3'                  |
| TNF- $\alpha$ | Probe            | 5'-FAM-AATGGGCTTTCCGAATTCACTGGAGC-TAMRA-3'    |
|               | Primer (forward) | 5'-TCATGCACCACCATCAAGGA-3'                    |
|               | Primer (reverse) | 5'-GAGGCAACCTGACCACTCTCC-3'                   |
| IL-1 $\beta$  | Probe            | 5'-FAM-ATGATCCCAATGAGTCGGCTGGAGA-TAMRA-3'     |
|               | Primer (forward) | 5'-GCTGCTACTCATTCACTGGCAA-3'                  |
|               | Primer (reverse) | 5'-TGCTGCTGGTGATTCTCTTGTA-3'                  |
| IL-18         | Probe            | 5'-FAM-TTCACAGAGAGGGTCACAGCCAGTCCT-TAMRA-3'   |
|               | Primer (forward) | 5'-CCTGTGTTTCGATATGACTGA-3'                   |
|               | Primer (reverse) | 5'-ACAGGAGAGGGTAGAGACATTTTACTA-3'             |
| NLRP3         | Probe            | 5'-FAM-AGGCCGGAATTCACCAACCCAGCT-TAMRA-3'      |
|               | Primer (forward) | 5'-TGCCTTGGGAGACTCAGGAG-3'                    |
|               | Primer (reverse) | 5'-CAGAGGTCAGAGCTGAACAACA-3'                  |
| caspase-1     | Probe            | 5'-FAM-TGGCACATTTCCAGGACTGACTGGGACC-TAMRA-3'  |
|               | Primer (forward) | 5'-GGACATCCTTCATTCATCCTCAGAAACA-3'            |
|               | Primer (reverse) | 5'-TTTCTTTCCATAACTTCTGGGCTTT-3'               |
| IL-4          |                  | Mm00445259_m1 (Thermo Fisher Scientific Inc.) |
| IL-13         |                  | Mm00434204_m1 (Thermo Fisher Scientific Inc.) |
| IFN- $\gamma$ |                  | Mm01168134_m1 (Thermo Fisher Scientific Inc.) |
